# Supplementary material
Source: PubMed Central journal article supplement (PMC7155380)

## 1 Supplemental information

2

### 3 **Methods:**

#### 4 **CD4<sup>+</sup> T regulatory cells stain**

5 Peripheral blood mononuclear cells (PBMCs) from healthy donors and STAT5b-  
6 deficient patients were purified by Ficoll-Paque Plus density gradient centrifugation (GE  
7 Healthcare). A million of PBMCs from healthy donor, a disease control (patient with  
8 *FoxP3* mutation), and STAT5b-deficient patients were stimulated with 10 µg/ml of  
9 *Staphylococcus aureus* Enterotoxin B (SEB) by 24 hours. PBMCs were pre-surface  
10 stained during 45 min at 4°C. After this time, the cells were recovered, washed and  
11 stained for FOXP3 expression. The antibodies were purchased from BD (CD3, UCHT1,  
12 CD8, RPA-T8; CD25, M-A251; CD45RO, UCHL1; FOXP3, 259D/C7) and Tonbo  
13 biosciences (CD, SK3). The samples were acquired with an LSR-Fortessa (BD)  
14 cytometer and analyzed using FlowJo, LLC software version 10.4.2.

15

#### 16 **VEGF-A expression in murine NK cells**

17 The CD3<sup>-</sup>NK1.1<sup>+</sup> NK cells from *Stat5b*<sup>+/+</sup> (WT) and *Stat5b*<sup>-/-</sup> mice were sorted  
18 and lysed in peqGOLD TriFast (VWR). The RNA content was isolated and the  
19 expression of VEGF-A was analyzed using qPCR. The expression of VEGF-A was  
20 normalized to the expression of *Ube2d2*. Following primers were used: *mVegfa*-for:  
21 GCACAGCAGATGTGAATGCAG; *mVegfa*-rev: CGCTCTGAACAAGGCTCACA;  
22 *Ube2d2*-for: AGGTCCTGTTGGAGATGATATGTT; *Ube2d2*-rev:  
23 TTGGGAAATGAATTGTCAAGAAA.

---

24 **Statistics**

25           The statistical significance of differences between healthy donors and patients  
26 was determined by the Student's *t*-test. Differences between multiple groups were  
27 determined by Ordinary one-way ANOVA test. In mouse, the one-way ANOVA and  
28 Bonferroni's Multiple Comparison Test was applied for statistical analysis of each  
29 maturation stage. Statistical analyses were conducted using Prism 7.0 (GraphPad  
30 Software).

31

Journal Pre-proof

32 **Clinical details:**

33 In this study, we evaluated two female siblings with STAT5b deficiency. In 2007,  
34 the STAT5b deficiency was identified in both siblings who are daughters of  
35 consanguineous parents. Sequencing of *Stat5b* gene revealed a homozygous deletion  
36 of a single G at the junction of the exon13–intron13 (c.1680delG). Both patients  
37 presented with poor post-natal growth, lung disease, elevated GH levels, and  
38 abnormally low levels of circulating insulin-like growth factor-I (IGF-I) and IGF-binding  
39 protein (IGFBP)-3.<sup>1</sup> In 2013, these patients were referred to Texas Children’s Hospital,  
40 Houston, TX for treatment.

41

42 **Patient 1:** A 18 years old female with chronic lymphocytic lung disease, severe  
43 central obesity, autoimmune hypothyroidism, thoracic compression fracture and short  
44 stature due to growth hormone insensitivity. In 2013, she developed rhinovirus and  
45 adenovirus infections. She required cidofavir and steroids treatment to clear adenovirus  
46 infection. She then developed EBV viremia that required treatment with Rituximab. A  
47 year later she was diagnosed with Influenza and type I diabetes (Table 1).

48

49 **Patient 2:** A 17 years old girl with chronic lymphocytic lung disease (lung biopsy  
50 showed primarily CD4<sup>+</sup> lymphocytic infiltrations with minimal sub-pleural fibrosis),  
51 autoimmune hypothyroidism, thoracic compression fracture from prolonged steroids use  
52 juvenile idiopathic arthritis (JIA), and short stature due to growth hormone insensitivity  
53 (Table 1). Her viral infections included adenovirus, rhinovirus CMV and EBV viremia  
54 (required rituximab). Other infections included culture positive for multi-drug resistant *E.*

55 *coli* UTI. In 2016, she was diagnosed pulmonary alveolar proteinosis with *Aspergillus*  
56 *terreus* and *Candida albicans* were identified in bronchoalveolar lavage (BAL) sample.

57

### 58 **Immunological profiles:**

59 The immunologic profiles from both patients are shown in Table E1. We  
60 observed a severe reduction in the total NK cell counts in both patients (Figure 1, A).  
61 The patient 1 was characterized with an extreme and progressive reduction of NK cells  
62 numbers and percentages. The first immunological studies at presentation to our center  
63 showed NK cells in the lower limit of the reference range (Table E1). However, they  
64 remained low over time with an abnormal phenotype suggesting the pivotal participation  
65 of STAT5b protein in the development, homeostasis, and proliferation of NK cells. B cell  
66 populations counts were normal to elevated (see Table E1). The patients had a long  
67 history of pulmonary infections since infancy and poor specific antibody responses  
68 (historical clinical data and personal communication) for which they have been on  
69 prolonged immunoglobulin replacement. These patients had moderate CD4 and CD8 T  
70 cell lymphopenia. We observed higher number of CD4<sup>+</sup>CD45RO<sup>+</sup> with a skewed  
71 CD45RA/CD45RO ratio suggesting a chronic activated dysregulated T cell phenotype <sup>2</sup>  
72 (Table E1). Depending on the inflammatory state of the patients at the time the  
73 lymphocyte counts were taken, there can be variability in the T and B cell levels. This  
74 variability has been previously described. <sup>2</sup>

75 STAT5b is required for transcription of *FOXP3*, *CD25*, and *Bcl-2* <sup>3, 4</sup> The  
76 CD4<sup>+</sup>CD25<sup>+</sup> cell subset, referred to as T regulatory cells (Treg), is characterized by  
77 higher expression of *FOXP3*; however, our results showed an absence of

78 CD4<sup>+</sup>CD25<sup>+</sup>FOXP3<sup>+</sup> cells in STAT5b-deficient patients and in a disease control (IPEX-  
79 patient) compared to healthy control (see Fig E7, A). Moreover, after Staphylococcal  
80 Enterotoxin B (SEB) stimulation, both patients had severe reduction of  
81 CD4<sup>+</sup>CD25<sup>+</sup>FOXP3<sup>+</sup> cell counts representing only 2.39% (Pt 1) and 1.78% (Pt 2) of the  
82 total CD4 T cells compared with our healthy control values of 5.61% (see Fig E7, B).  
83 Reduced CD25 and FOXP3 expression (referred to as T regulatory cells-Treg cells)  
84 observed in our patients, could also be associated with increased susceptibility to  
85 opportunistic infections, autoimmunity and an abnormal accumulation and proliferation  
86 of lymphocytes.

87 *In vitro*, T cell proliferation to mitogens (phytohemagglutinin, concanavalin A, and  
88 pokeweed mitogen) was constantly low in both patients compared to our reference  
89 values (Table E1). Similar results were observed in response to recall antigens  
90 (*Candida*, tetanus toxoid, and *Diphtheria antigen*). These results suggest a general  
91 functional T cell defect. The low T cell proliferation, higher frequency of CD4<sup>+</sup>CD45RO<sup>+</sup>  
92 cells, and diminution of CD4<sup>+</sup>CD25<sup>+</sup>FOXP3<sup>+</sup> Tregs cells suggests an abnormal  
93 mechanism in the peripheral homeostasis.

94

95

96

97

98

99

100

101 **References**

- 102 1. Hwa V, Camacho-Hubner C, Little BM, David A, Metherell LA, El-Khatib N, et al.  
103 Growth hormone insensitivity and severe short stature in siblings: a novel mutation  
104 at the exon 13-intron 13 junction of the STAT5b gene. *Horm Res* 2007; 68:218-24.
- 105 2. Hwa V, Nadeau K, Wit JM, Rosenfeld RG. STAT5b deficiency: lessons from STAT5b  
106 gene mutations. *Best Pract Res Clin Endocrinol Metab* 2011; 25:61-75.
- 107 3. Kanai T, Jenks J, Nadeau KC. The STAT5b Pathway Defect and Autoimmunity. *Front*  
108 *Immunol* 2012; 3:234.
- 109 4. Cohen AC, Nadeau KC, Tu W, Hwa V, Dionis K, Bezrodnik L, et al. Cutting edge:  
110 Decreased accumulation and regulatory function of CD4+ CD25(high) T cells in  
111 human STAT5b deficiency. *J Immunol* 2006; 177:2770-4.  
112

Journal Pre-proof

Table E1

|                                          | Pt 1<br>(#/mm <sup>3</sup> ) | Pt 2<br>(#/mm <sup>3</sup> ) | References values<br>(#/mm <sup>3</sup> )<br>>10 – 18 years | Pt 1<br>(%) | Pt 2<br>(%) | References values<br>(%)<br>>10 – 18 years |
|------------------------------------------|------------------------------|------------------------------|-------------------------------------------------------------|-------------|-------------|--------------------------------------------|
| CD3                                      | 1446                         | 1207                         | 1014 – 2557                                                 | 72.7        | 43.6        | 54.0 – 78.0                                |
| CD4                                      | 1016                         | 667                          | 538 – 1569                                                  | 51.5        | 24.1        | 23.3 – 50.3                                |
| CD8                                      | 366                          | 467                          | 371 – 936                                                   | 18.4        | 16.9        | 14.8 – 34.8                                |
| CD4 <sup>+</sup> CD45RA <sup>+</sup>     | 82                           | 54                           | 134 – 969                                                   | 4.1         | 2.0         | 3.3 – 32.9                                 |
| CD4 <sup>+</sup> CD45RO <sup>+</sup>     | 925                          | 581                          | 301 – 919                                                   | 46.5        | 21.0        | 15.6 – 41.8                                |
| CD19 <sup>+</sup>                        | 310                          | 750                          | 204 – 703                                                   | 15.6        | 27.1        | 10.8 – 25.0                                |
| CD19 <sup>+</sup> CD27 <sup>+</sup>      | 108                          | 73                           | 19 – 131                                                    | 5.4         | 2.6         | 1.0 – 5.2                                  |
| CD3 <sup>-</sup> CD56, CD16 <sup>+</sup> | 158                          | 57                           | 152 – 595                                                   | 7.9         | 5           | 7.0 – 28.0                                 |

  

| T cell-proliferation  | Pt 1    | Pt 2    | Reference values  | Pt 1   |       | Pt 2  |       | Reference values |        |
|-----------------------|---------|---------|-------------------|--------|-------|-------|-------|------------------|--------|
|                       |         |         |                   | Net    | Index | Net   | Index | Net              | Index  |
| <u>Mitogens (5 d)</u> |         |         |                   |        |       |       |       |                  |        |
| Medium                | 10,300  | 2,861   | 215 – 1,161       | 14,460 |       | 1,079 |       |                  |        |
| PHA (10 µg/mL)        | 132,231 | 100,334 | 163,507 – 415,087 | 20,259 | 2.40  | 3,348 | 4.10  | >2,000           | & >2.0 |
| ConA (50 µg/mL)       | 127,848 | 59,932  | 80,718 – 286,866  | 317    | 1.02  | 569   | 1.53  | >2,000           | & >2.0 |
| PWM (100 ng/mL)       | 75,809  | 49,607  | 37,006 – 157,955  | 561    | 1.04  | 2,135 | 2.98  | >2,000           | & >2.0 |
| <u>Antigen (5 d)</u>  |         |         |                   |        |       |       |       |                  |        |
| Medium                |         |         |                   |        |       |       |       |                  |        |
| <i>Candida</i>        |         |         |                   |        |       |       |       |                  |        |
| <i>Diphtheria</i>     |         |         |                   |        |       |       |       |                  |        |
| Tetanus tox           |         |         |                   |        |       |       |       |                  |        |

  

| Serum Ig   | Pt 1 | Pt 2 | References values |
|------------|------|------|-------------------|
| IgG, ng/dL | 857  | 959  | 641 – 1353        |
| IgM, ng/dL | 159  | 89   | 69 – 295          |
| IgA, ng/dL | 47   | 193  | 4 – 180           |
| IgE, UI/dL | <1.5 | <1.5 | 1.5 – 43.0        |

## Online Repository material

### Figure legends

**FIG E1: STAT5a activation is not affected in STAT5b-deficient patients.** **A**, One million of B-lymphocyte cells lines (BLCL) from healthy donors and STAT5b-deficient patients were lysed and immunoblotted for STAT5a, STAT5b, and Actin (loading control). **B**, Nuclear localization of STAT5 in B-cell lines from healthy donors and STAT5b-deficient patients after IL-21 (50 ng/ml) stimulation. Cells were fixed, permeabilized, and stained for phosphorylated STAT5 (red), followed by counterstaining with DAPI (blue). **C**, Graph shows the nuclear colocalization between pSTAT5 and DAPI after IL-21 stimulation. Data shown is a representative set of results from three independent experiments.

**FIG E2: NK cell phenotype gating strategy.** Cells were first gated for mononuclear cells (SSC-A vs FSC-A) and singles (SSC-H vs SSC-W and FSC-H vs FSC-W). Living cells were gated based on the negative staining for AmCyan and separated in CD45 positive cells. NK cells were identified as CD56<sup>bright</sup>CD3<sup>-</sup> and CD56<sup>dim</sup>CD3<sup>-</sup> NK cells. Then, all NK cell markers expression was analyzed in total NK cells or in each NK cell subsets.

**FIG E3: Immature CD56<sup>dim</sup> NK cell phenotype in STAT5b-deficient patients.** NK cells from healthy donors and STAT5b-deficient patients were analyzed by flow cytometry. **A**, Representative perforin and developmental markers plots in CD56<sup>dim</sup> NK cell subset from STAT5b-deficient patients and healthy donors. **B**, The percentage of



positive CD56<sup>dim</sup> NK cells for each receptor of interest was defined using a corresponding fluorescence minus one (FMO). Data from age- and sex-matched healthy donor are included (light blue circles)<sup>30</sup>, in addition to data from unmatched controls acquired at the time of the experiment (dark blue circles). Horizontal bars represent means, and the vertical bars indicate standard deviations. Statistical significance was analyzed using the unpaired Student's *t*-test. Data shown are a representative set of results from three independent experiments. \*\**p*<0.01, \*\*\**p*<0.001, \*\*\*\**p*<0.0001. HD, healthy donors (dark blue circle); previously reported healthy female age and gender matched controls (light blue circle); Pt, STAT5b-deficient patients, Pt 1 (red box); Pt 2 (green box).

**FIG E4: Lower cytokine production in STAT5b-deficient patients.** **A**, Representative IFN- $\gamma$  production plots in NK cell subset from STAT5b-deficient patients and a healthy donor. **B**, Percentage of positive CD56<sup>bright</sup> NK cells for each cytokine of interest was defined using a corresponding fluorescence minus one (FMO). Horizontal bars represent means, and the vertical bars indicate standard deviations. Statistical significance was analyzed using the unpaired Student's *t*-test. Data shown are a representative set of results from three independent experiments. \**p*<0.05, \*\**p*<0.01, \*\*\**p*<0.001, \*\*\*\**p*<0.0001. HD, healthy donors (dark blue circle); previously reported healthy female age and gender matched controls (light blue circle);<sup>30</sup> Pt, STAT5b-deficient patients, Pt 1 (red box); Pt 2 (green box). **C**, Functional response of NK cells from healthy donors and patient 1 after IL-12 (10 ng/ml), IL-15 (1 ng/ml), and IL-18 (10 ng/ml) stimulation. **D**, Percentage and counts of NK cells from *Stat5b*<sup>+/-</sup> compared to WT

mice are shown. **E**, *Vegf-a* expression was analyzed in NK cells sorted from *Stat5b*<sup>+/-</sup> compared to WT mice. **F**, Tumor weight relative to body weight from WT and *Stat5b*<sup>+/-</sup> mice (n=8/genotype).

**FIG E5: Decreased expression of activation and adhesion receptors in NK cell subsets from STAT5b-deficient patients.** NK cell phenotypes were measured by flow cytometry. The percentage of positive **A**, CD56<sup>bright</sup> or **B**, CD56<sup>dim</sup> NK cells for each receptor of interest was defined using a corresponding FMO. Horizontal bars represent means, and the vertical bars indicate standard deviations. Statistical significance was analyzed using the unpaired Student's *t*-test. Results are representative of three independent experiments. \**p*<0.05, \*\**p*<0.01, \*\*\**p*<0.001. HD, healthy donors (dark blue circle); previously reported healthy female age and gender matched controls (light blue circle);<sup>30</sup> Pt, STAT5b-deficient patients, Pt 1 (red box); Pt 2 (green box).

**FIG E6: Lytic granule convergence does not occur through IL-15 signaling.** **A**, Images of fixed cells showing representative NK cells from healthy donor and patient 1 conjugated to susceptible K562 target cells (10:1 ratio) in absence or presence of IL-15 (25 ng/ml). The yellow arrowheads indicate the microtubule-organizing center (MTOC); TL, transmitted light. **B**, Lytic granules convergence, F-actin accumulation, and MTOC polarization in NK cells from healthy donor and patient 1. The statistical differences between healthy donors and patients was determined by Ordinary one-way ANOVA test. \**p*<0.05. **C**, Specific cytotoxicity assay were performed using the Cr<sup>51</sup> release protocol. PBMCs from healthy donor or STAT5b-deficient patients were incubated with

K562 target cells in the absence or presence of 25 ng/ml rhIL-15; results from Fig E7, C, are shown as lytic units required to lyse 10% of target cells (LU<sub>10</sub>). Patients' LU<sub>10</sub> was normalized to the healthy donor control for each assay.

**Figure E7: Decreased CD4<sup>+</sup>CD25<sup>high</sup>FoxP3<sup>+</sup> Tregs cells in STAT5b-deficient patients.** CD25 and FOXP3 expression were analyzed by flow cytometry for CD4<sup>+</sup> T cell from healthy donors, a disease control (IPEX-patient), and STAT5b-deficient patients. **A**, CD25 and FOXP3 expression in CD4<sup>+</sup> T cells directly ex vivo and **B**, after their stimulation with SEB by 24 hours.

**Fig E1**

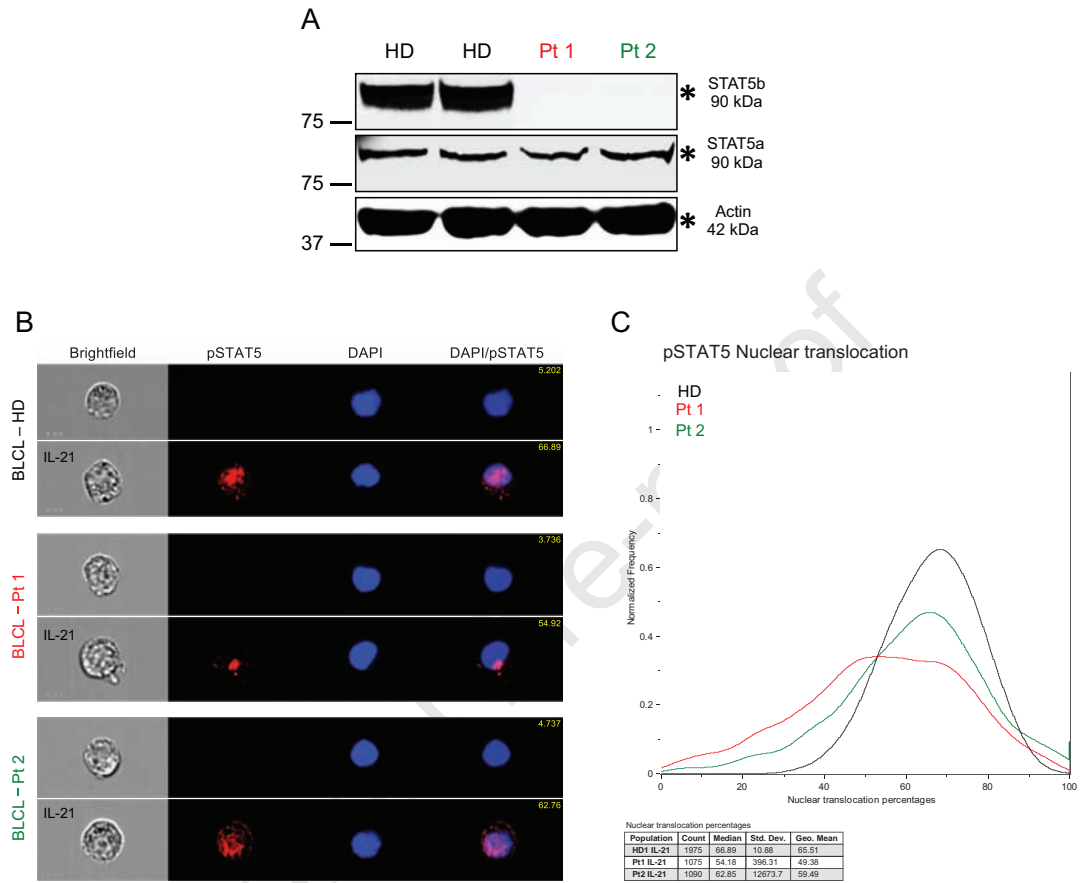

Fig E2

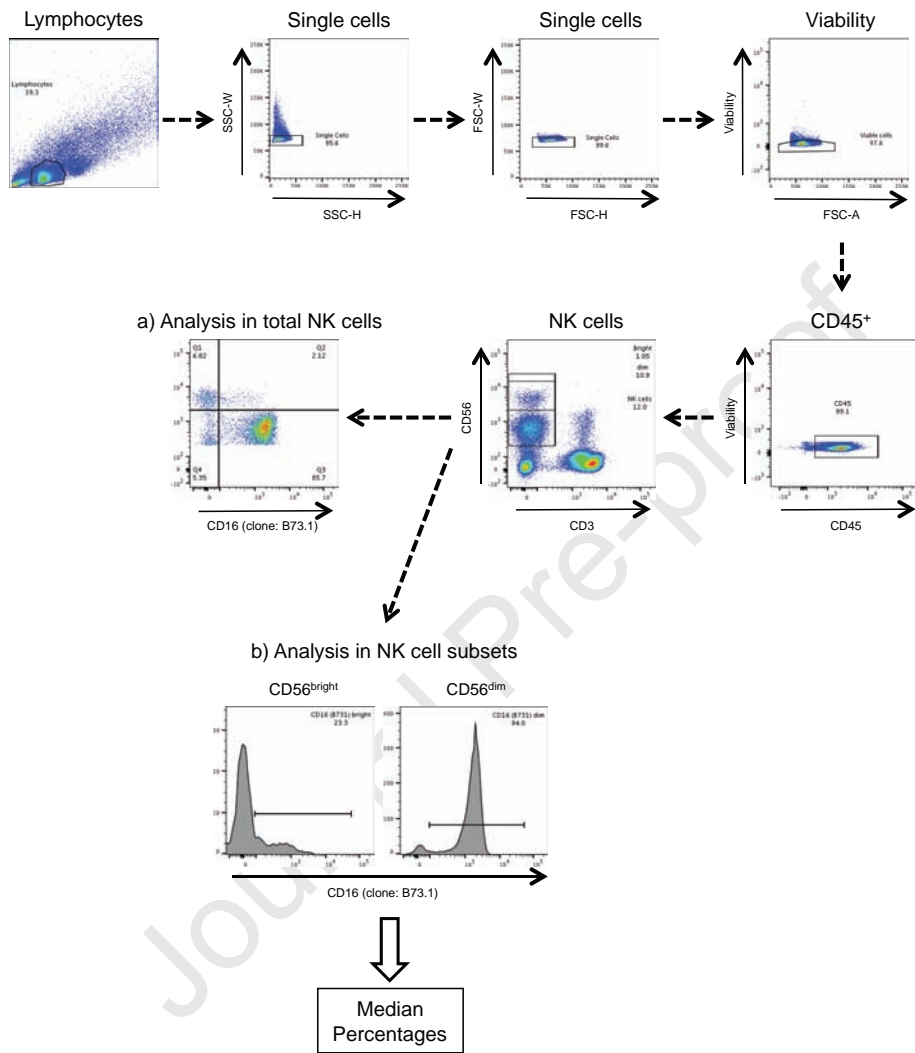

Fig E3

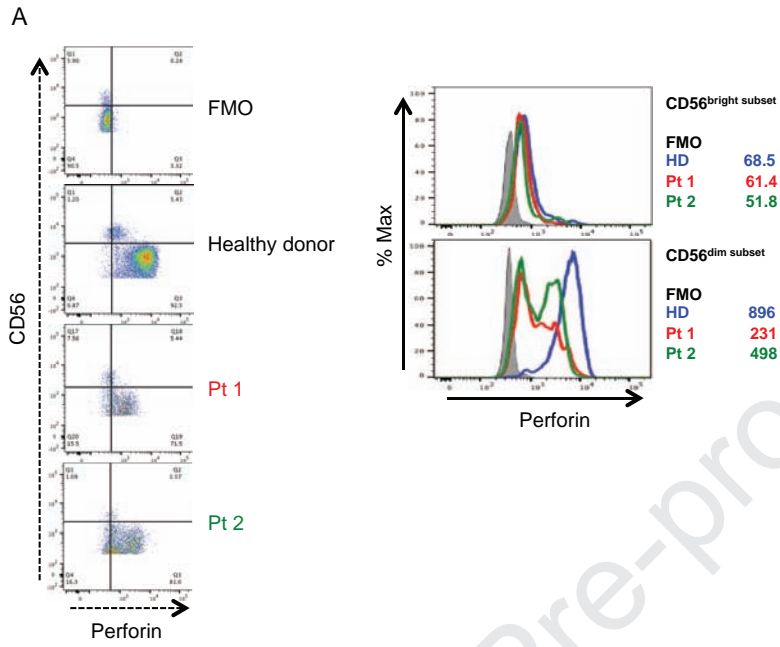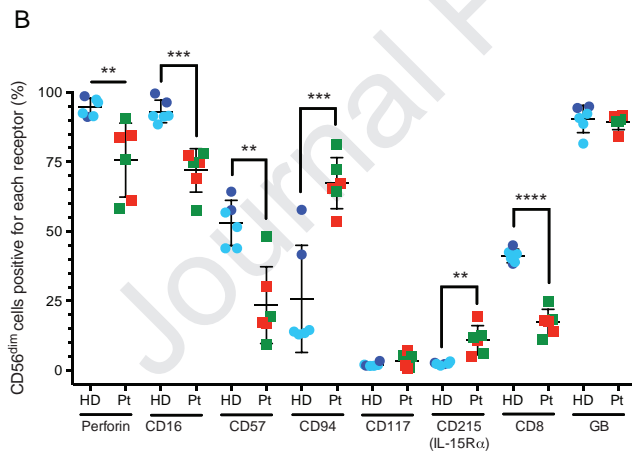

**Fig E4**

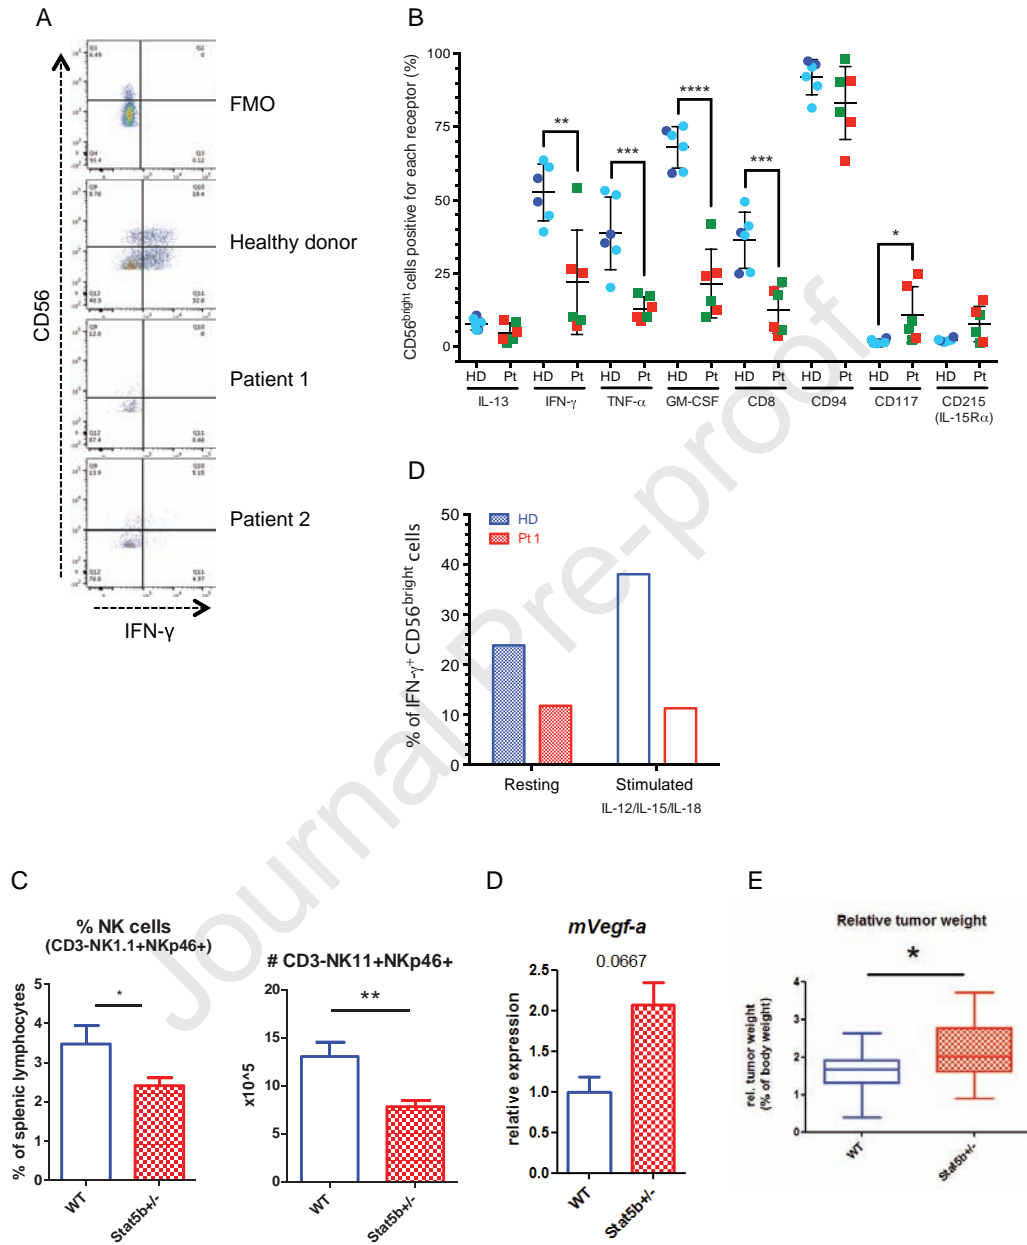

Fig E5

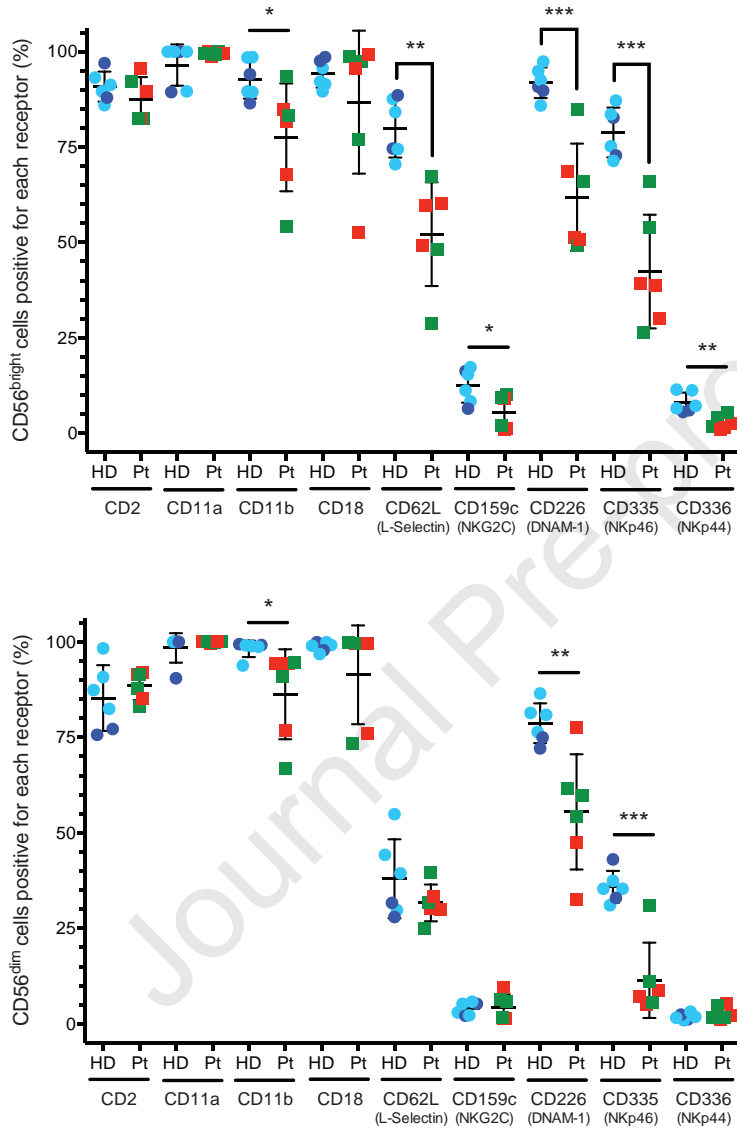



**Fig E6**

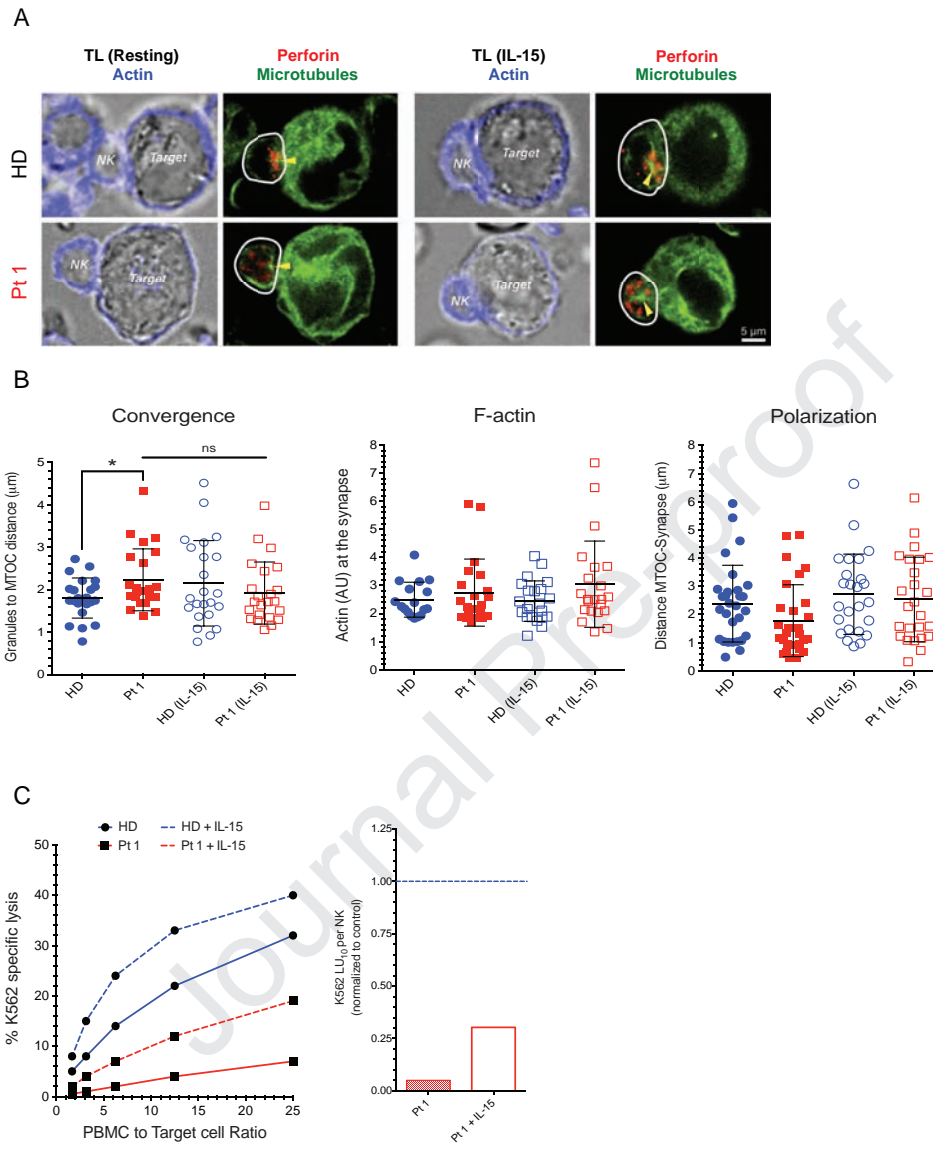

Fig E7

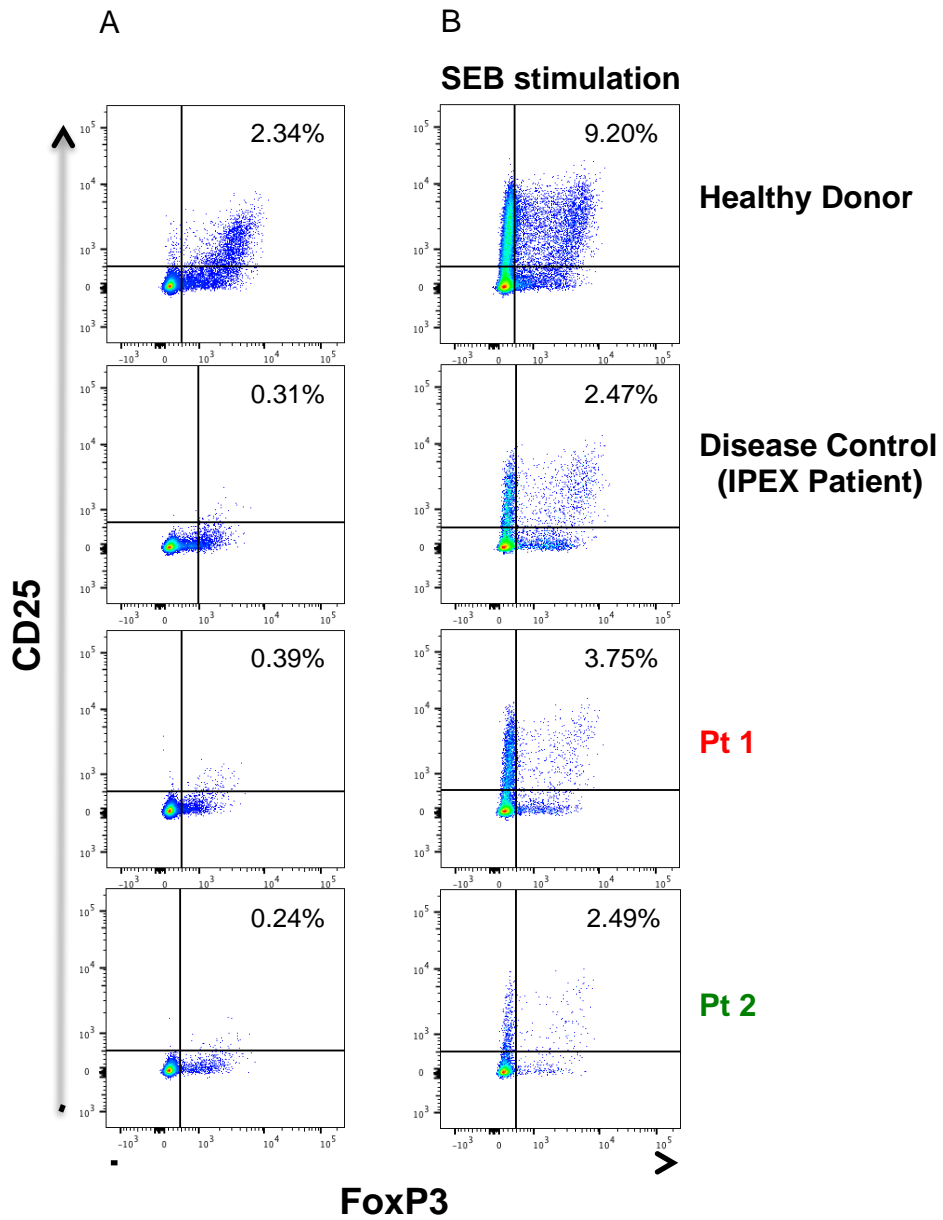

Supplement: NIHMS1544019-supplement-1.pdf [file NIHMS1544019-supplement-1.pdf]
